# Supplementary material for: Multifunctional Pt(iv) complexes containing a glutathione S-transferase inhibitor lead to enhancing anticancer activity and preventing metastasis of osteosarcoma cells
Source: Royal Society of Chemistry journal article supplement (doi:10.1039/c8mt00296g), 2018-12-06

Electronic Supplementary Information (ESI)

**Multifunctional Pt(IV) complexes containing a glutathione s-transferase inhibitor lead to enhancing anticancer activity and preventing metastasis of osteosarcoma cells**

Hong Chen,<sup>§</sup> Feihong Chen,<sup>§</sup> Xinyi Wang, and Shaohua Gou\*

Pharmaceutical Research Center and School of Chemistry and Chemical Engineering, Jiangsu Province Hi-Tech Key Laboratory for Bio-medical Research, Southeast University, Nanjing 211189, China

\* E-mail: [sgou@seu.edu.cn](mailto:sgou@seu.edu.cn)

<sup>§</sup> These authors contributed equally.

**Table S1** IC<sub>50</sub> values of complexes **1-3** and cisplatin toward cisplatin-sensitive SGC-7901 and cisplatin-resistant SGC-7901/DDP cancer cells for 72 h

| Complex   | IC <sub>50</sub> (μM) |              |                 |
|-----------|-----------------------|--------------|-----------------|
|           | SGC-7901              | SGC-7901/DDP | RF <sup>a</sup> |
| <b>1</b>  | 3.37±0.15             | 5.03±0.33    | 1.49            |
| <b>2</b>  | 1.64±0.02             | 1.05±0.09    | 0.64            |
| <b>3</b>  | 8.42±0.34             | 3.75±0.24    | 0.45            |
| Cisplatin | 12.69±0.82            | 67.88±2.16   | 5.35            |

<sup>a</sup> RF = IC<sub>50</sub> (cisplatin-resistant cancer cells) / IC<sub>50</sub> (cisplatin-sensitive cancer cells)

**Table S2** Enzyme activity of GSTs after treated with different concentrations of NBDHEX, NXSA, complex **1, 2** or **3**<sup>a</sup>

| Concentration | GSTs activity (nmol / min / 10 <sup>4</sup> cell) |        |          |          |          |
|---------------|---------------------------------------------------|--------|----------|----------|----------|
|               | NBDHEX                                            | NXSA   | <b>1</b> | <b>2</b> | <b>3</b> |
| 1 μM          | 0.0925                                            | 0.0685 | 0.0649   | 0.0674   | 0.0384   |
| 5 μM          | 0.0439                                            | 0.0372 | 0.0363   | 0.0386   | 0.0041   |
| 10 μM         | 0.0166                                            | 0.0124 | 0.0147   | 0.0163   | 0        |

<sup>a</sup> GSTs activity of control group was 0.2111 nmol / min / 10<sup>4</sup> cell.

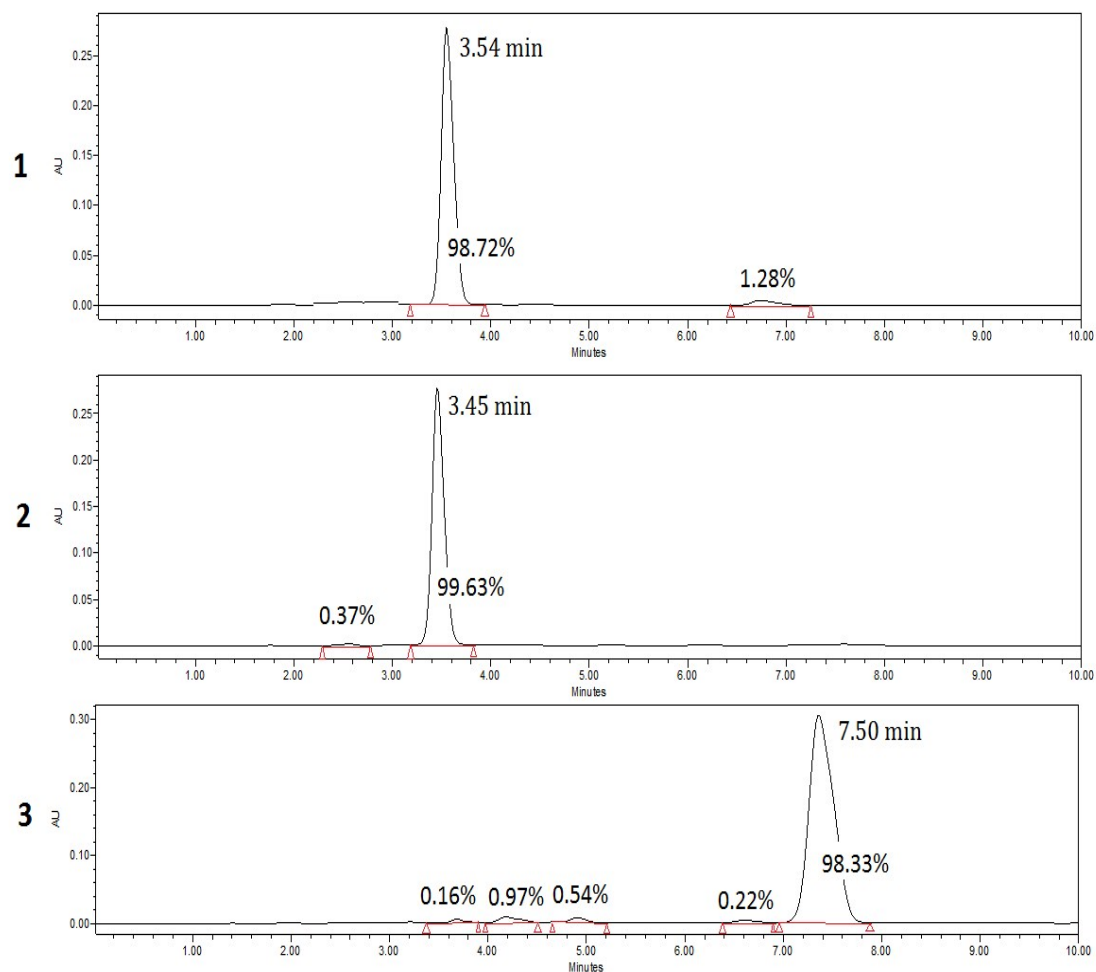

**Fig. S1** Purity of complexes **1**, **2** and **3** detected by HPLC.

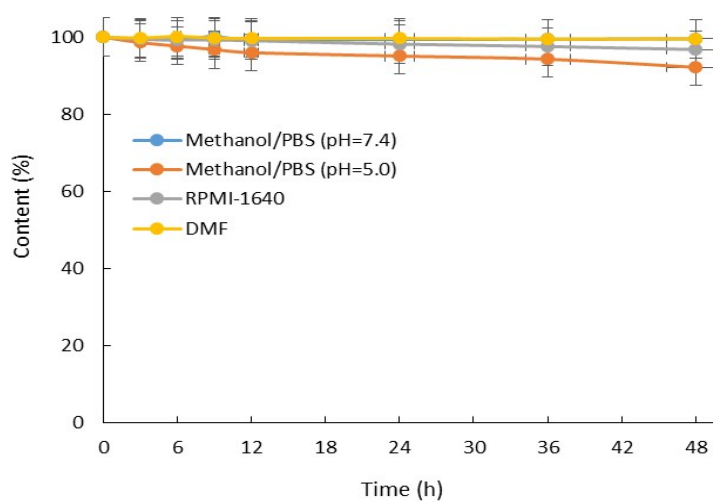

**Fig. S2** Stability of complex **1** in different media at room temperature.

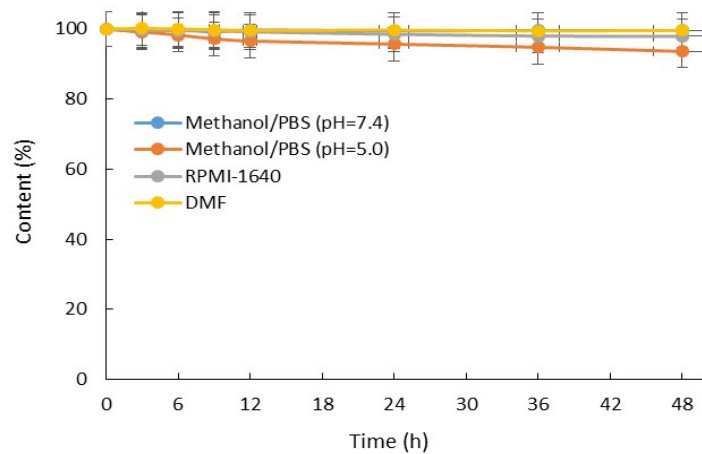

**Fig. S3** Stability of complex 2 in different media at room temperature.

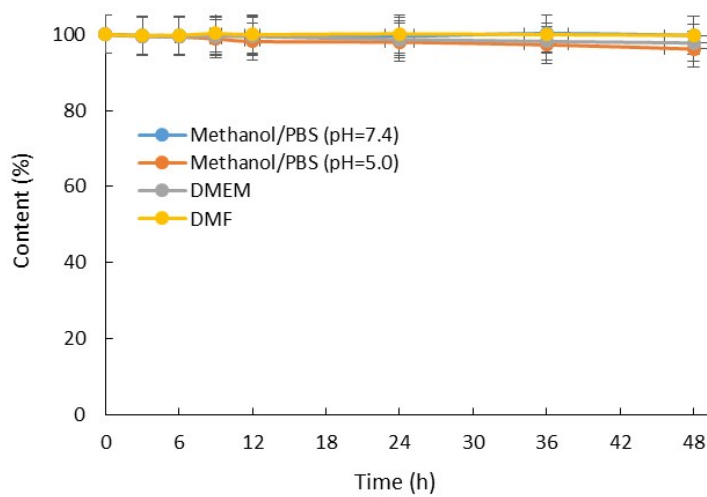

**Fig. S4** Stability of complex 3 in different media at room temperature.

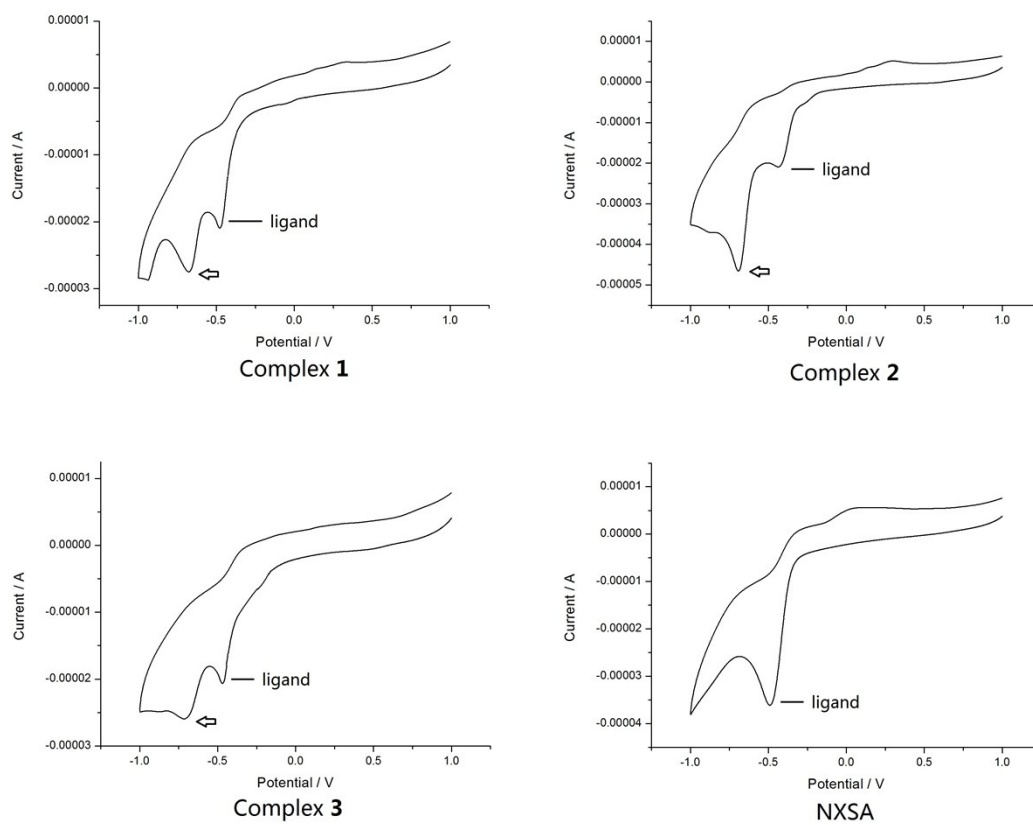

**Fig. S5** Cyclic voltammograms of complexes 1-3 and NXSA.

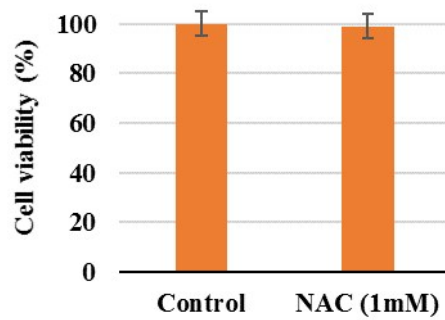

**Fig. S6** The cytotoxic effect of 1 mM NAC on U2OS cancer cells for 48 h.

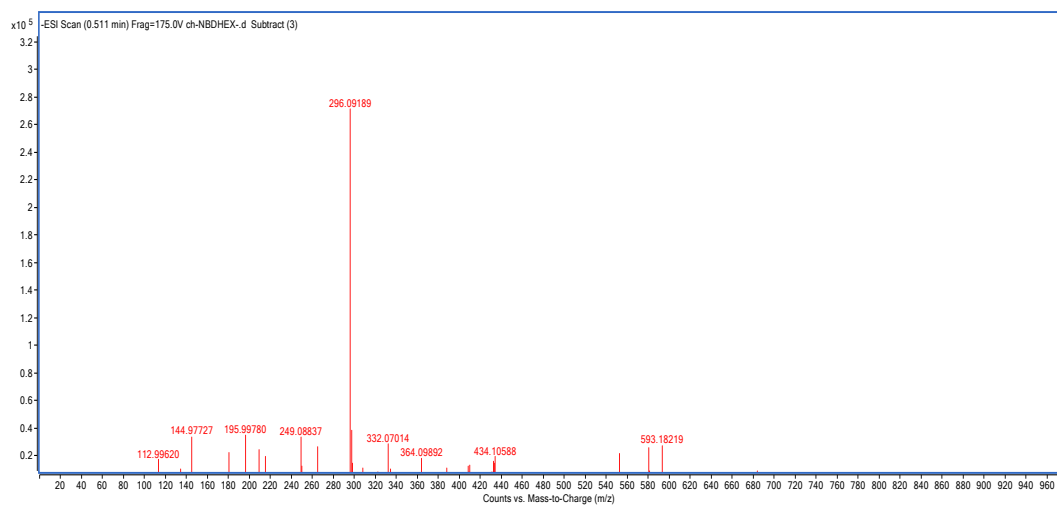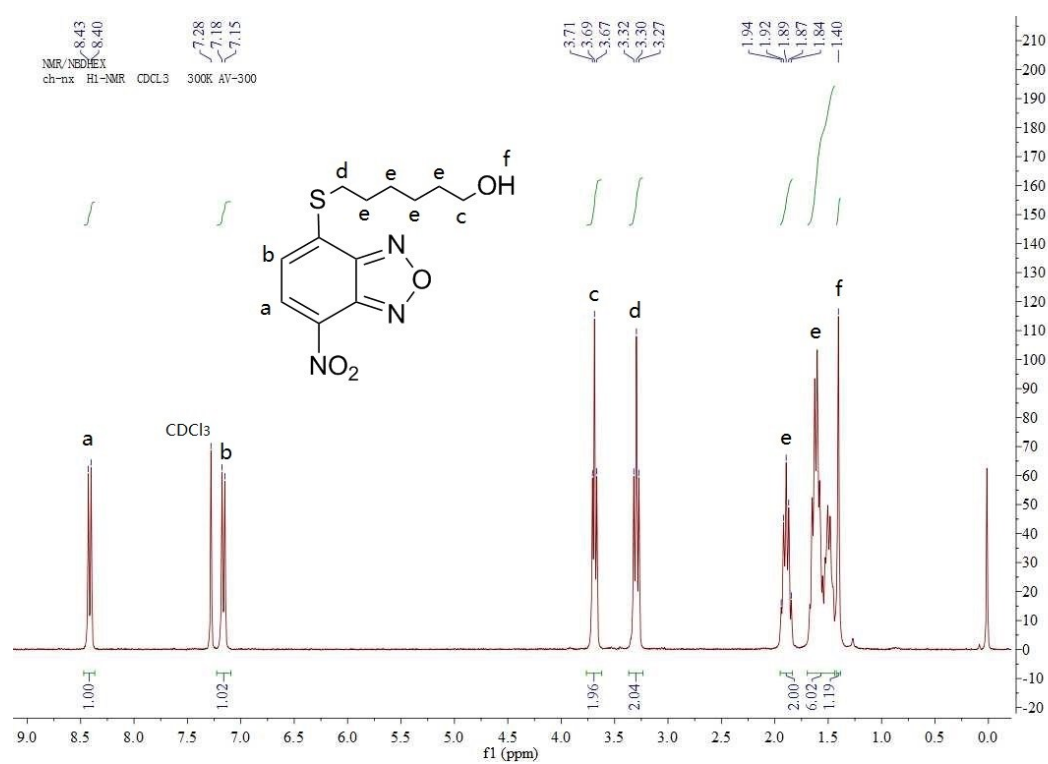

**Fig. S7** ESI-MS diagram and <sup>1</sup>H-NMR spectra of NBDHEX.

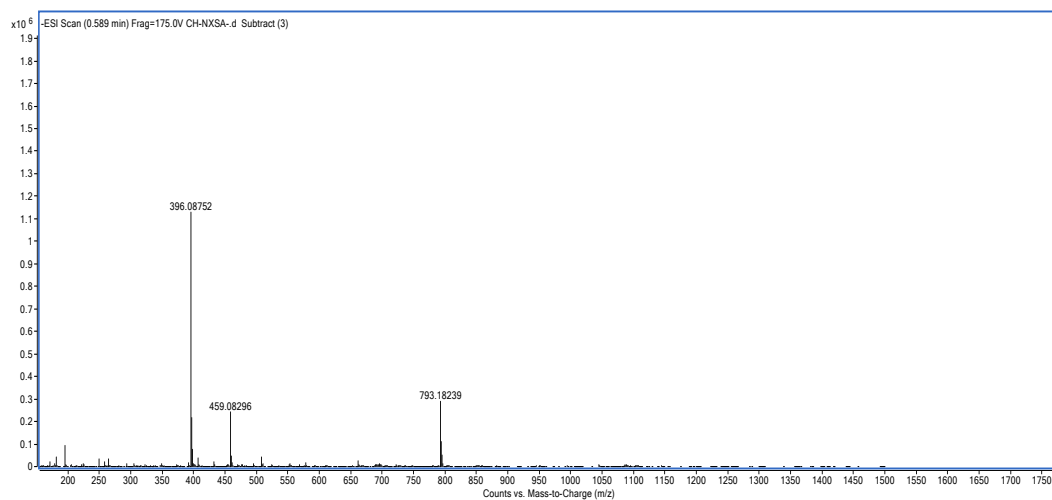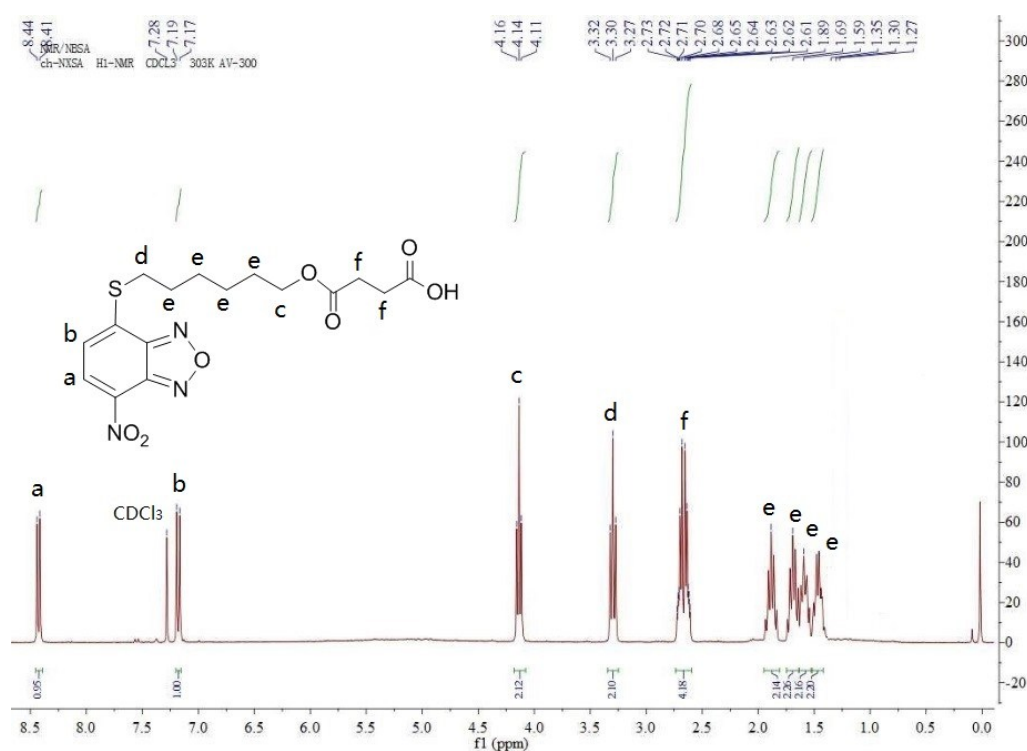

**Fig. S8** ESI-MS diagram and <sup>1</sup>H-NMR spectra of NXSA.

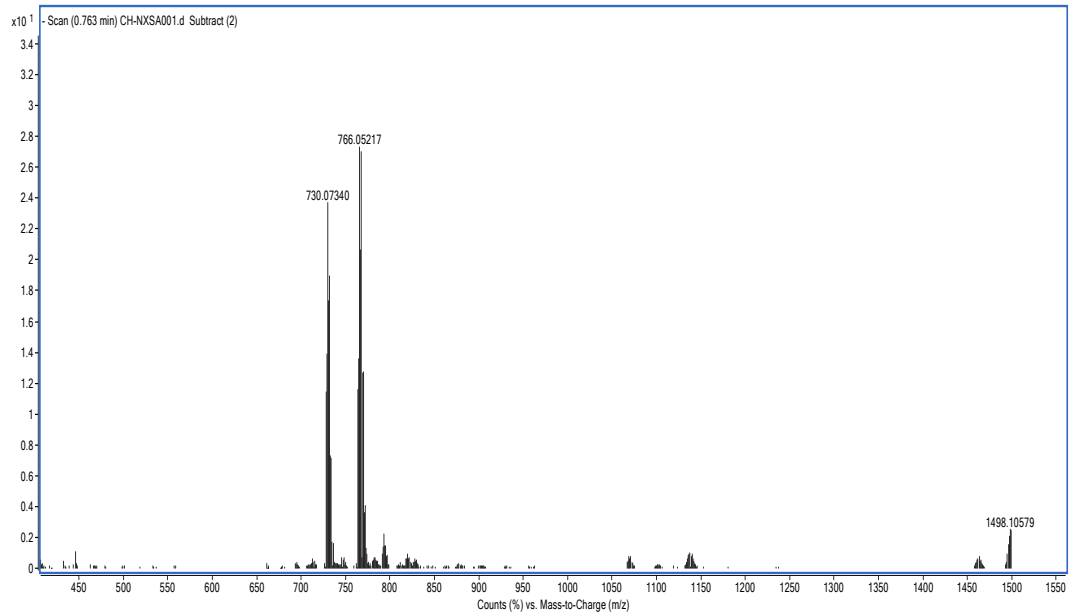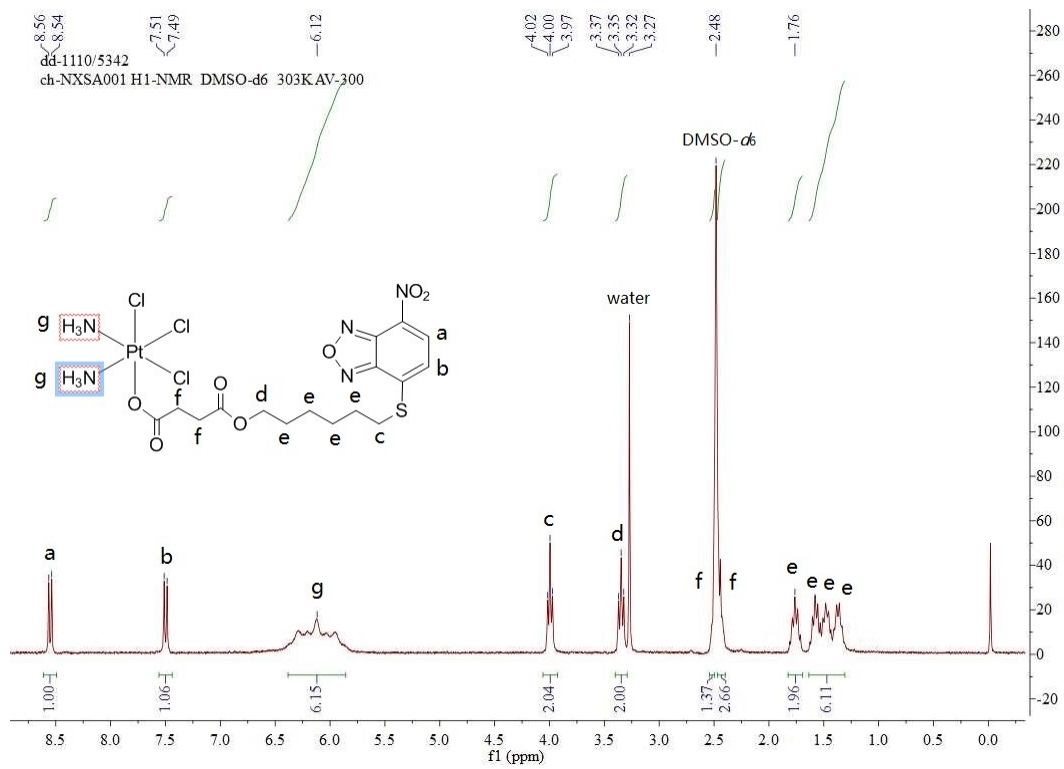



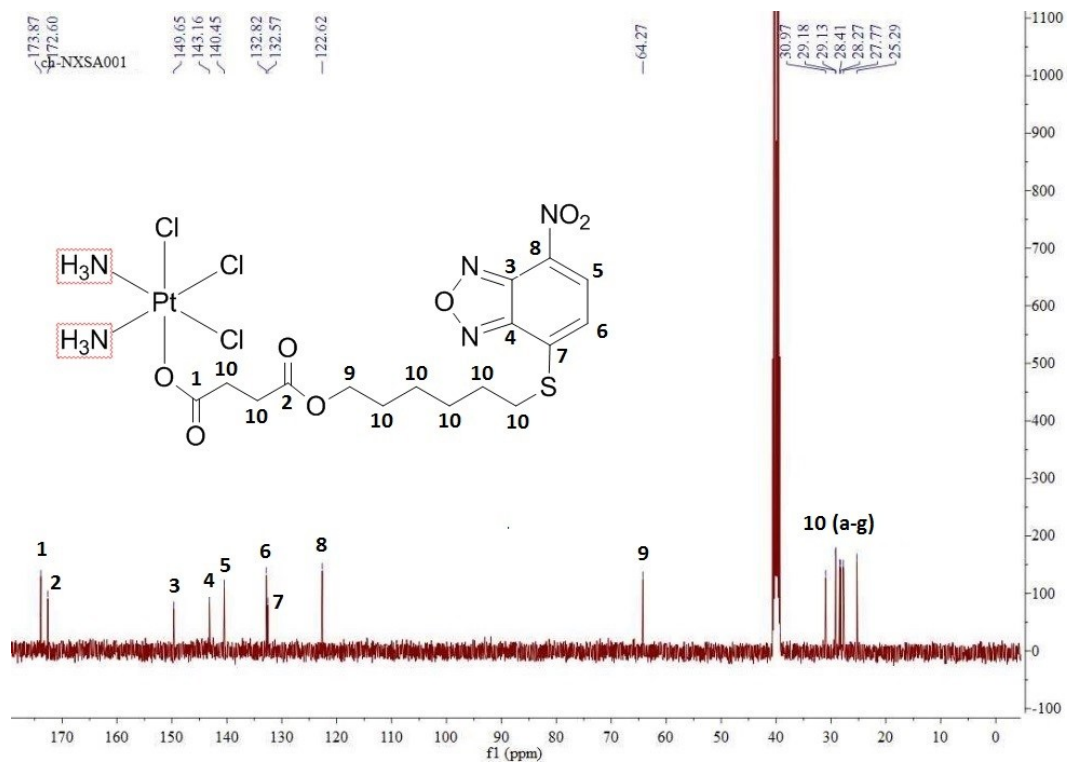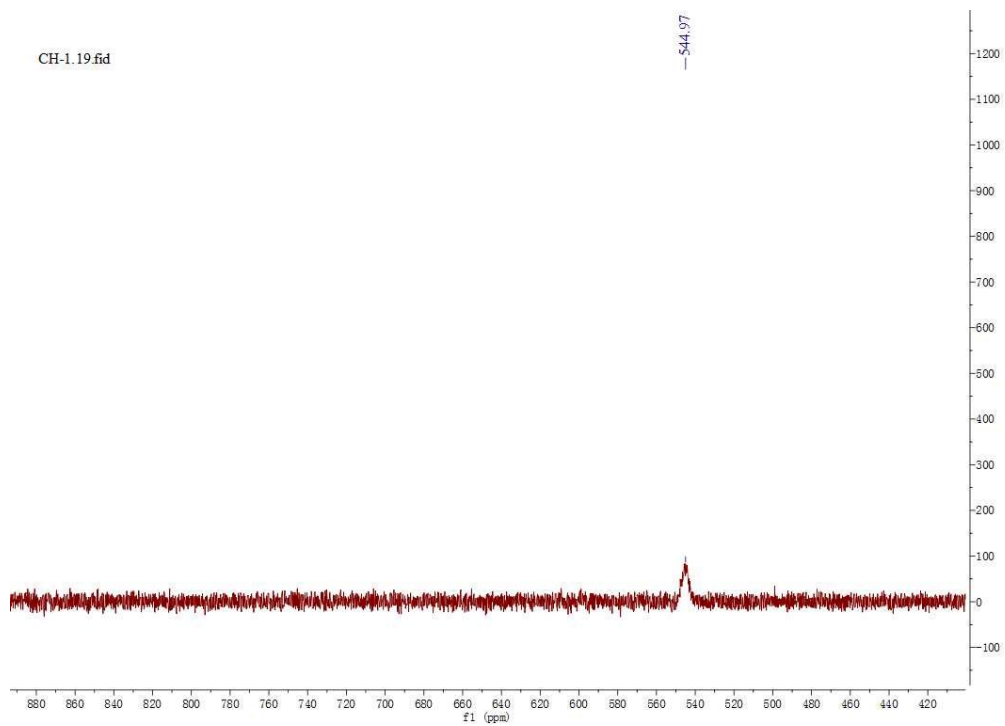

Fig. S9 ESI-MS diagram, and <sup>1</sup>H, <sup>13</sup>C and <sup>195</sup>Pt -NMR spectra of complex **1**.

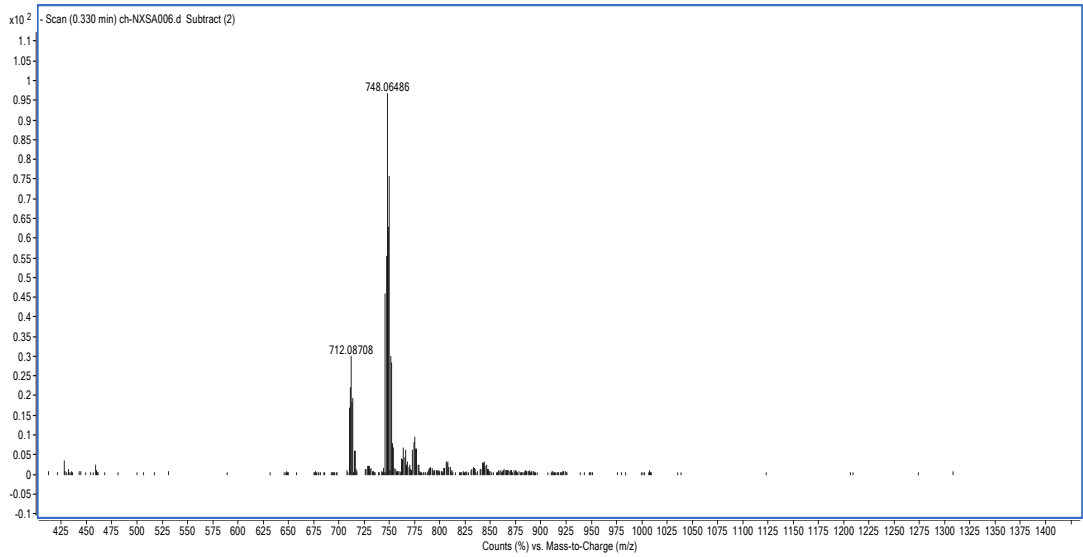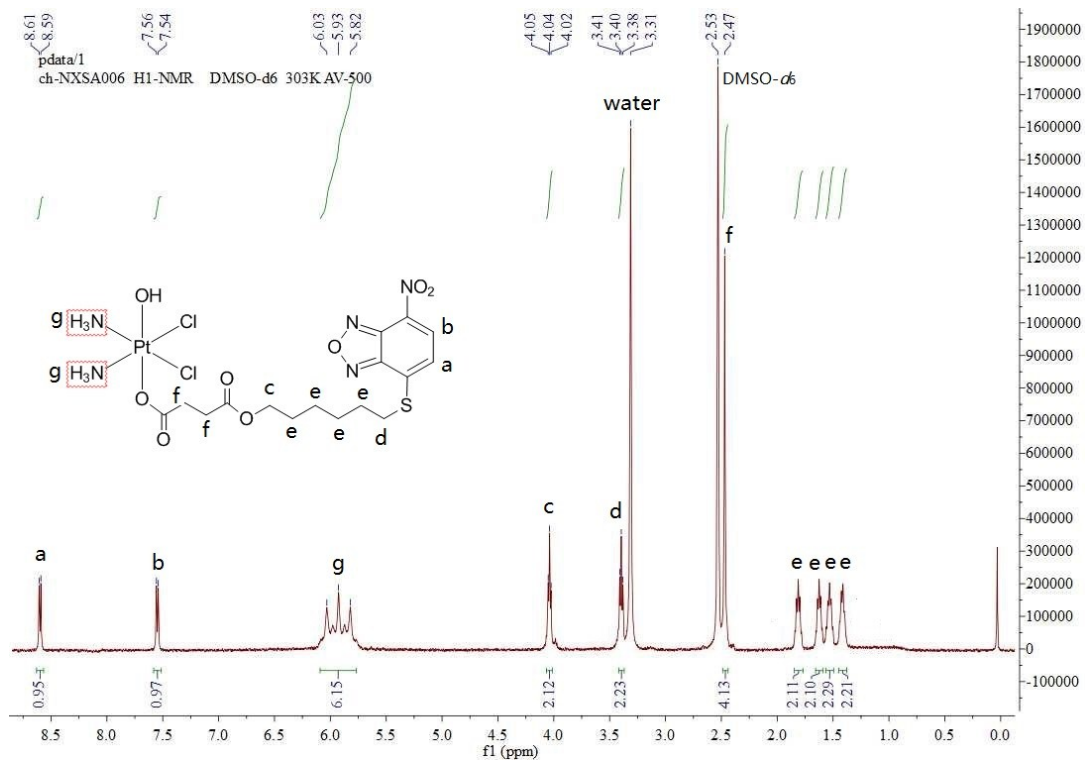

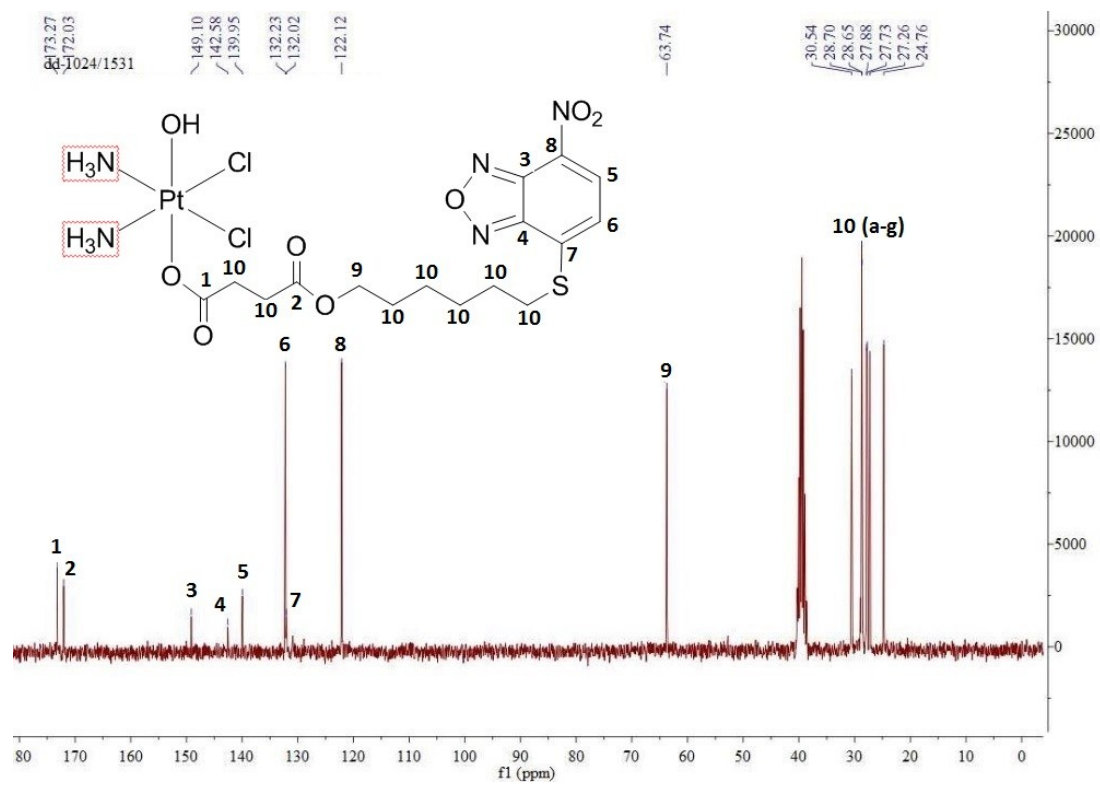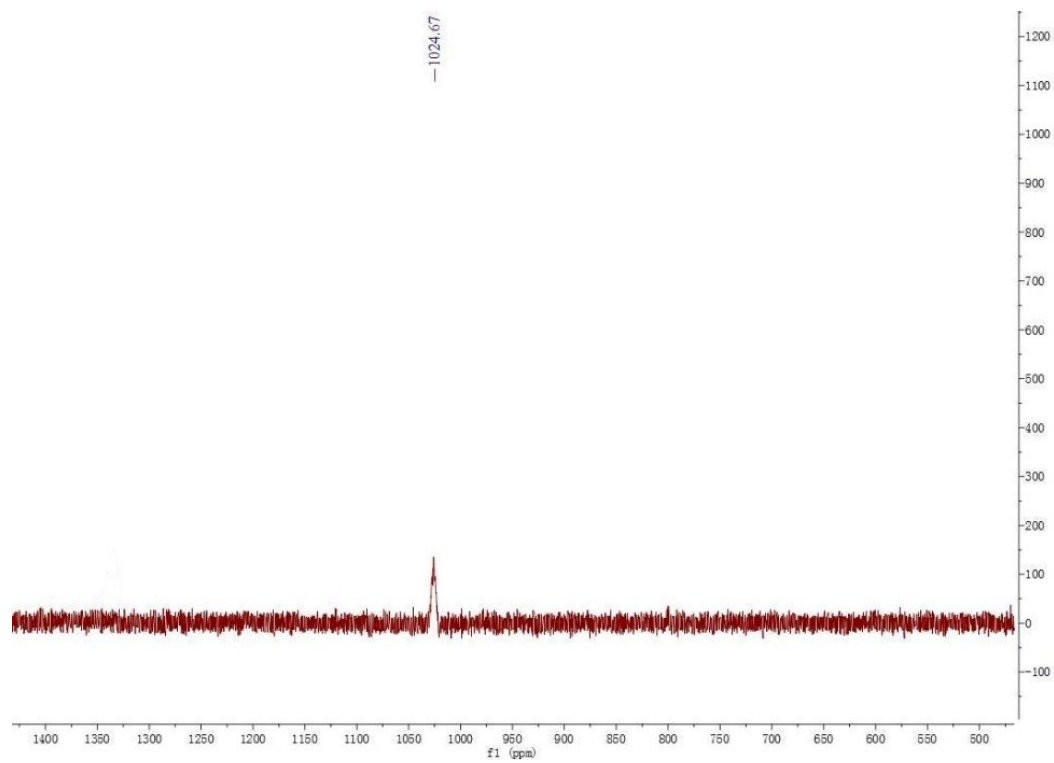

**Fig. S10** ESI-MS diagram, and <sup>1</sup>H, <sup>13</sup>C and <sup>195</sup>Pt -NMR spectra of complex 2.

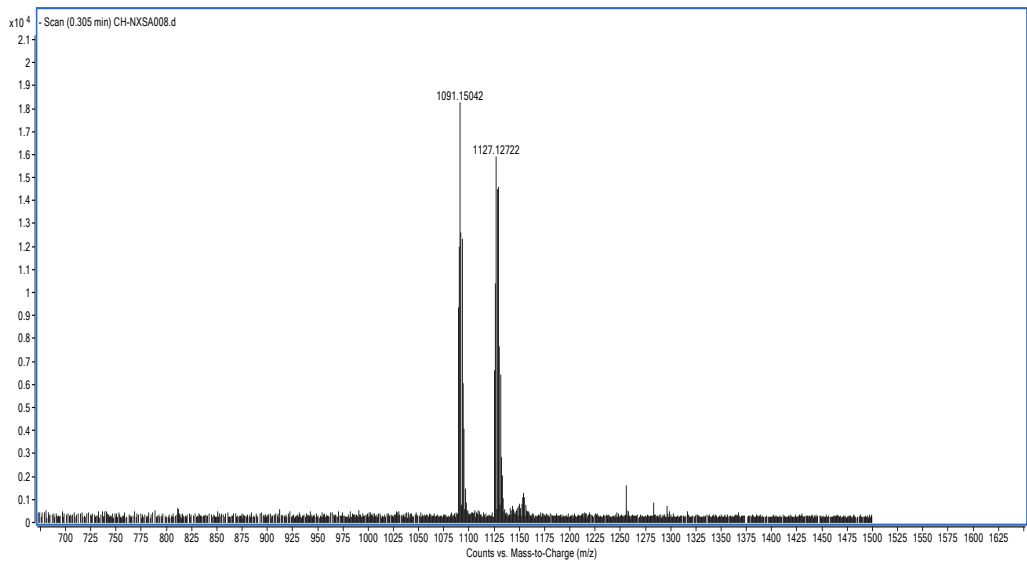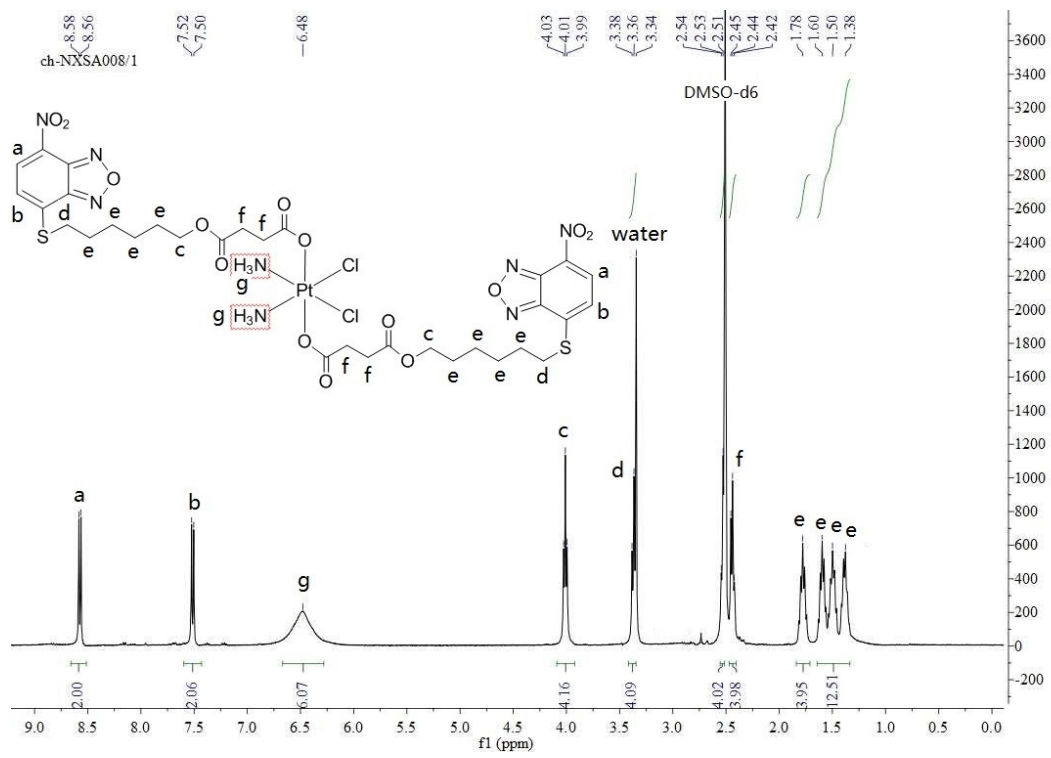

Supplement: c8mt00296g1.pdf [file c8mt00296g1.pdf]
